# Supplementary material for: Targeted Delivery to Tumor-associated Pericytes via an Affibody with High Affinity for PDGFRβ Enhances the in vivo Antitumor Effects of Human TRAIL
Source: PubMed Central journal article supplement — Theranostics. 2017 Jun 1;7(8):2261–76. doi: 10.7150/thno.19091 (PMC5505058; doi:10.7150/thno.19091), 2017-06-01
Supplement: thnov07p2261s1.pdf [file thnov07p2261s1.pdf]

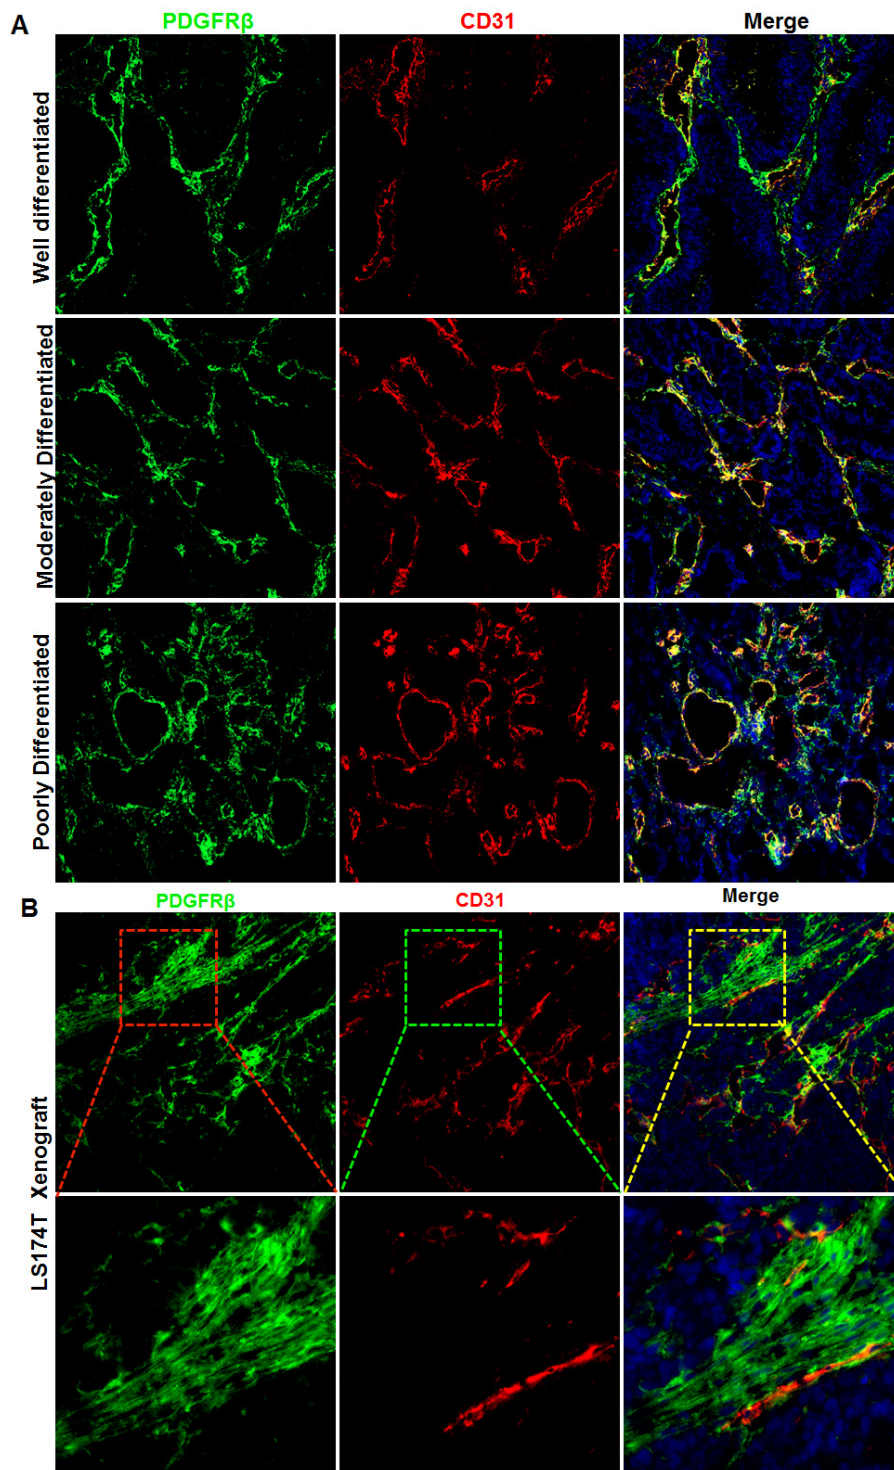

**Figure S1** Expression of PDGFR $\beta$  in tumor tissues. **(A)** PDGFR $\beta$  expression in tumor tissues derived from patients with colon cancer at different stages. **(B)** PDGFR $\beta$  expression in stroma of tumor tissues derived from mice bearing LS174T tumor grafts. Tumor tissues were sectioned under frozen conditions and dually stained with anti-PDGFR $\beta$  antibody (green) and anti-CD31 antibody (red). The nuclei of cells were visualized using DAPI (blue). Original magnification,  $\times 200$ .

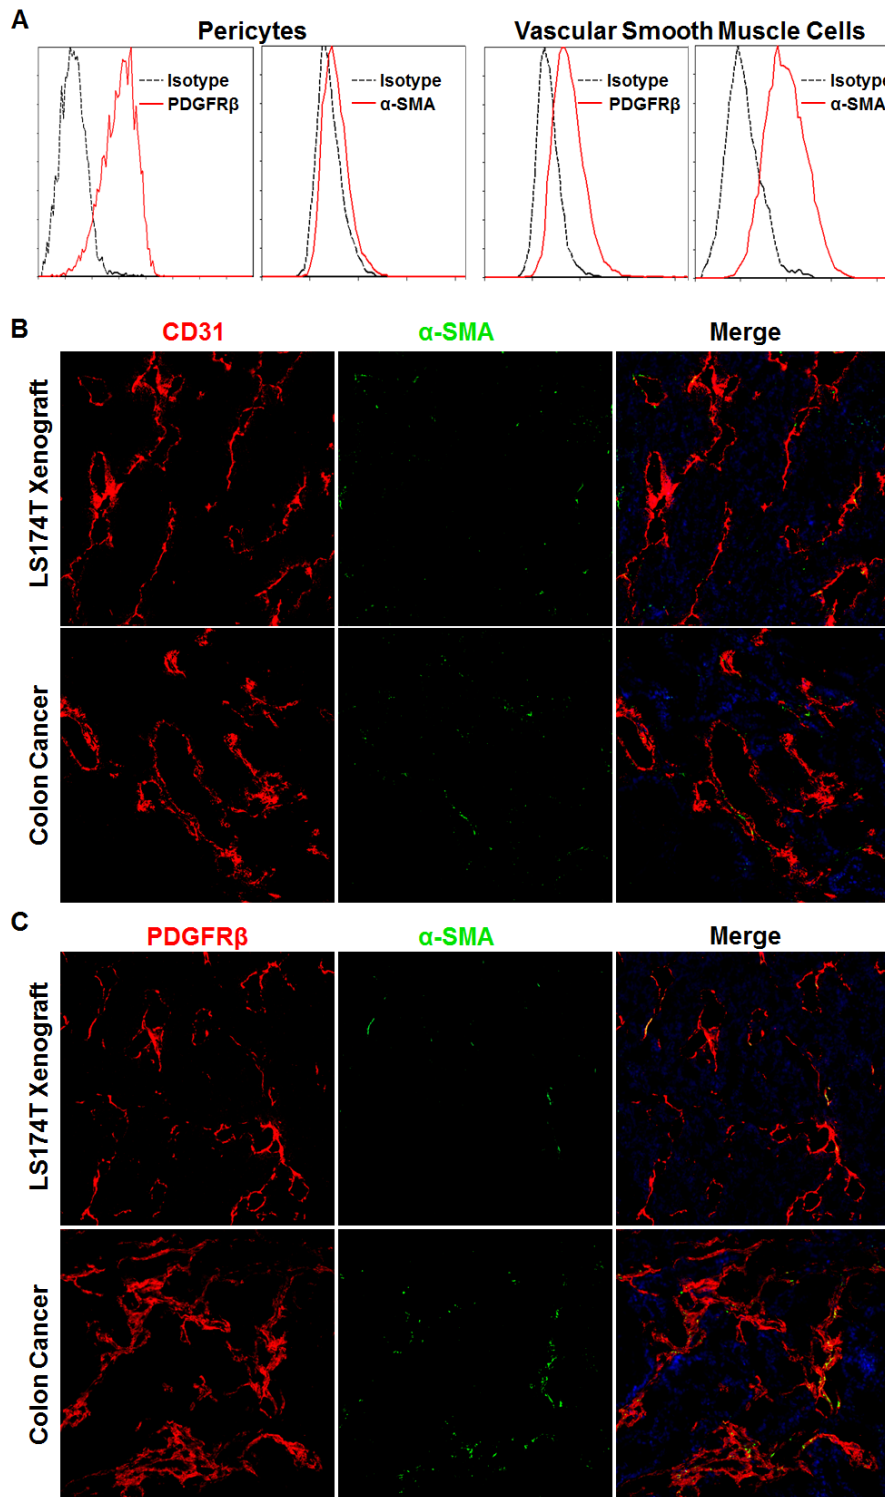

**Figure S2** Characterization of microvessels of tumor tissues. **(A)** Expression of PDGFR $\beta$  and  $\alpha$ -SMA in pericytes and vascular smooth muscle cells. **(B)** Co-localization of  $\alpha$ -SMA and CD31 in microvessels of tumor tissues. **(C)** Co-localization of  $\alpha$ -SMA and PDGFR $\beta$  in microvessels of tumor tissues. Original magnification,  $\times 200$ .

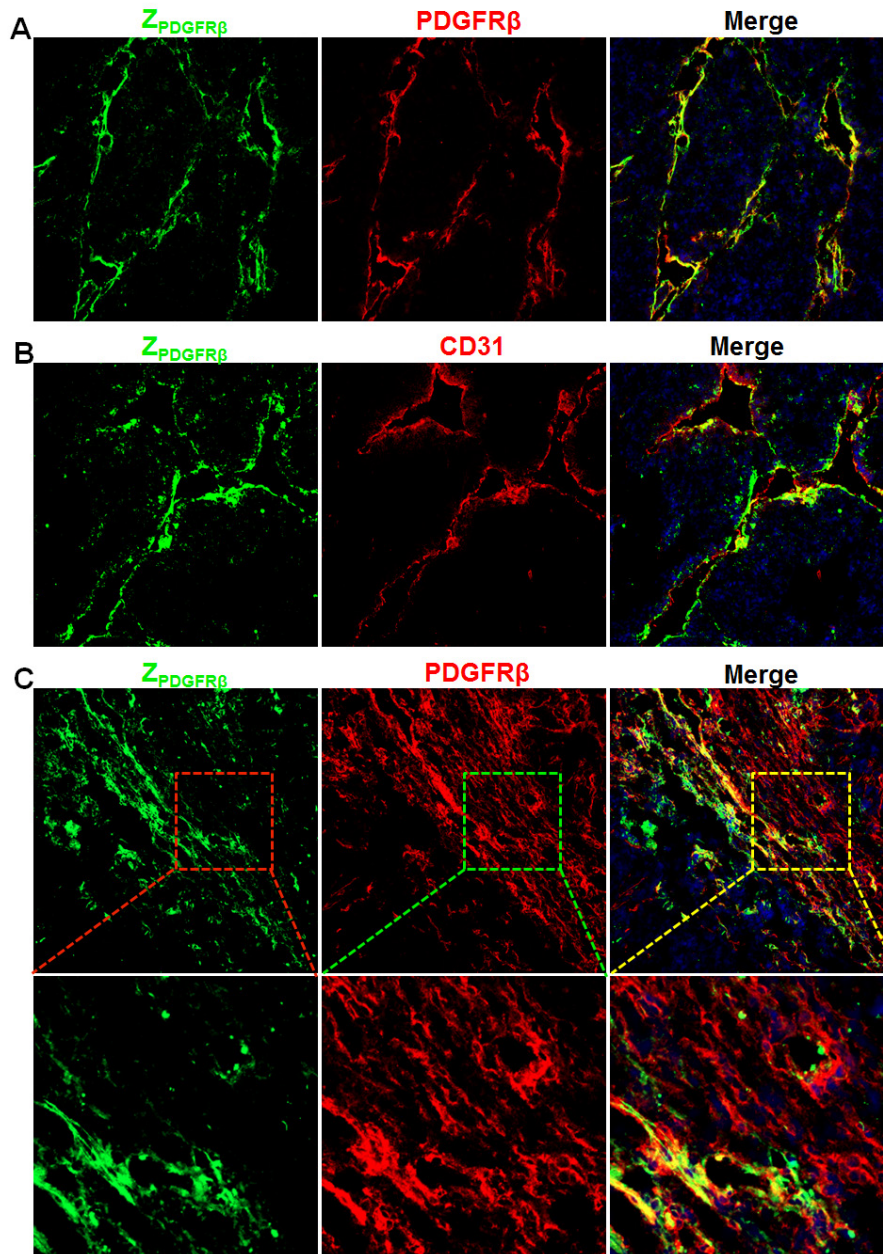

**Figure S3** Distribution of Z<sub>PDGFRβ</sub> affibody on pericytes and fibroblasts. **(A)** Co-localization of Z<sub>PDGFRβ</sub> affibody and PDGFRβ in tumor parenchyma. **(B)** Co-localization of Z<sub>PDGFRβ</sub> affibody and CD31 in tumor parenchyma. **(C)** Co-localization of Z<sub>PDGFRβ</sub> affibody and PDGFRβ in tumor stroma. Mice bearing LS174T tumor xenografts were intravenously injected with FAM-labeled Z<sub>PDGFRβ</sub> affibody (green). The tumor xenografts were collected at 30 min post-injection. The sectioned tumor tissues were stained with anti-PDGFRβ antibody or anti-CD31 antibody. The nuclei of cells were visualized using DAPI (blue). Original magnification, ×200.

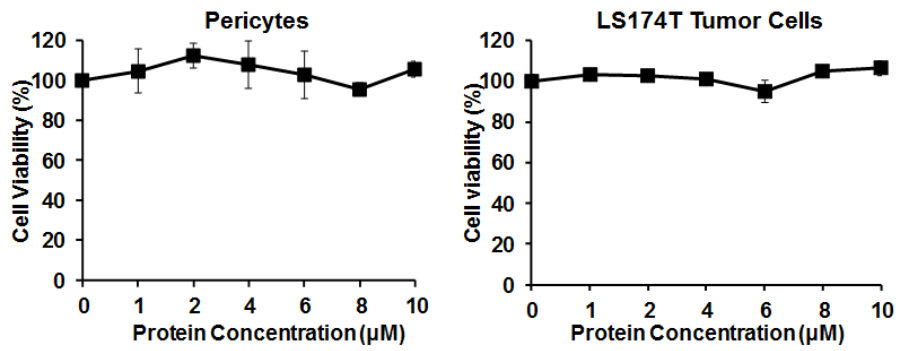

**Figure S4** Cytotoxicity of  $Z_{PDGFR\beta}$  affibody in pericytes and LS174T tumor cells. Cells ( $1 \times 10^4$ /well) were treated with  $Z_{PDGFR\beta}$  affibody at different concentrations (1-10  $\mu\text{M}$ ) overnight followed by measuring the viable cells using CCK-8. The viability of cell treated with PBS was considered as 100%.

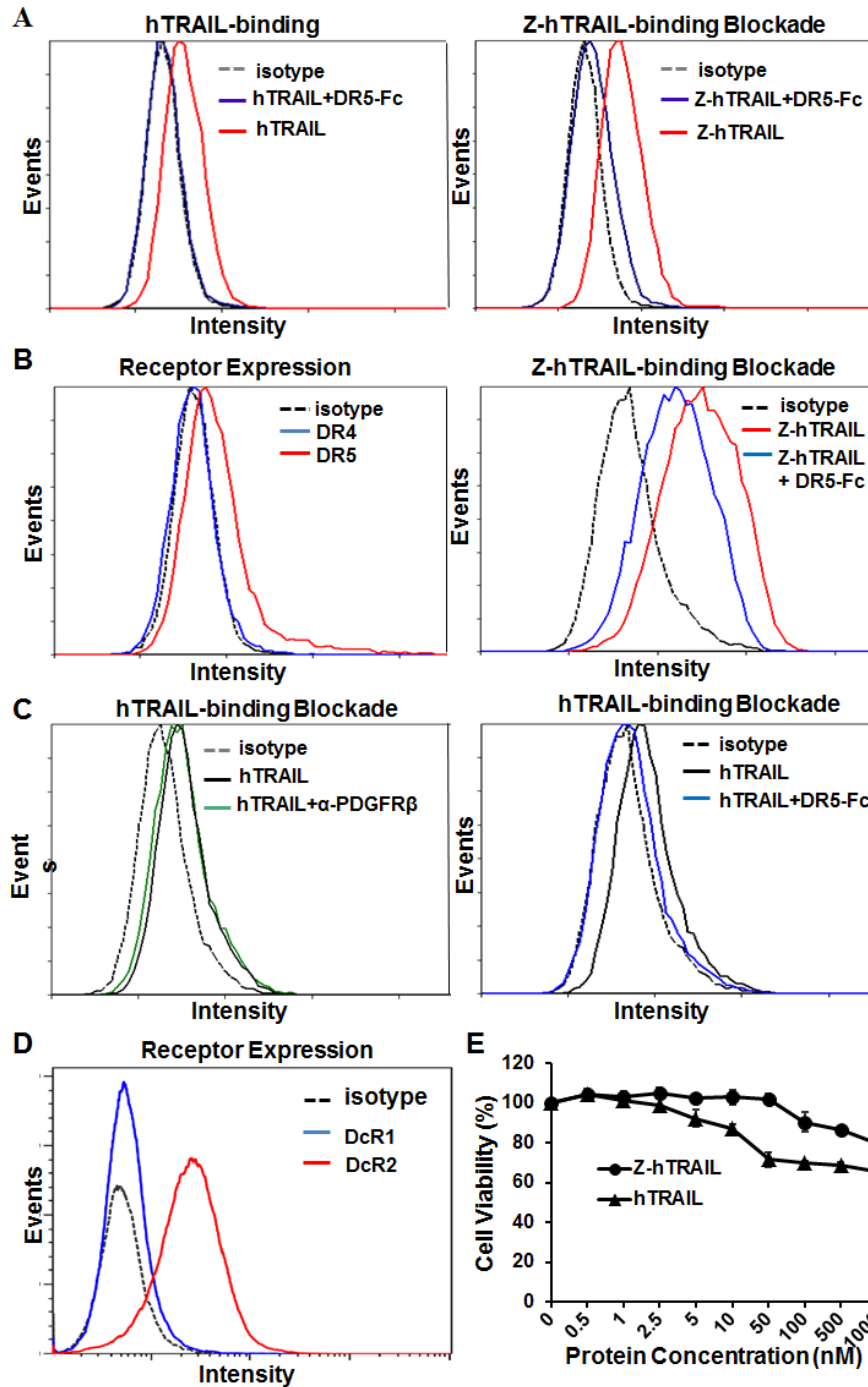

**Figure S5** Binding of Z-hTRAIL on tumor cells and pericytes. **(A)** DR5-Fc-mediated blockade of cell binding of Z-hTRAIL to COLO205 tumor cells. **(B)** Expression of death receptor on pericytes and DR5-Fc-mediated blockade of pericyte-binding of Z-hTRAIL. **(C)** Anti-PDGFR $\beta$  antibody- and DR-Fc-mediated blockade of pericyte-binding of hTRAIL. **(D)** Expression of decoy receptors (DcR1 and DcR2) on pericytes. **(E)** Cytotoxicity of Z-hTRAIL and hTRAIL in pericytes.

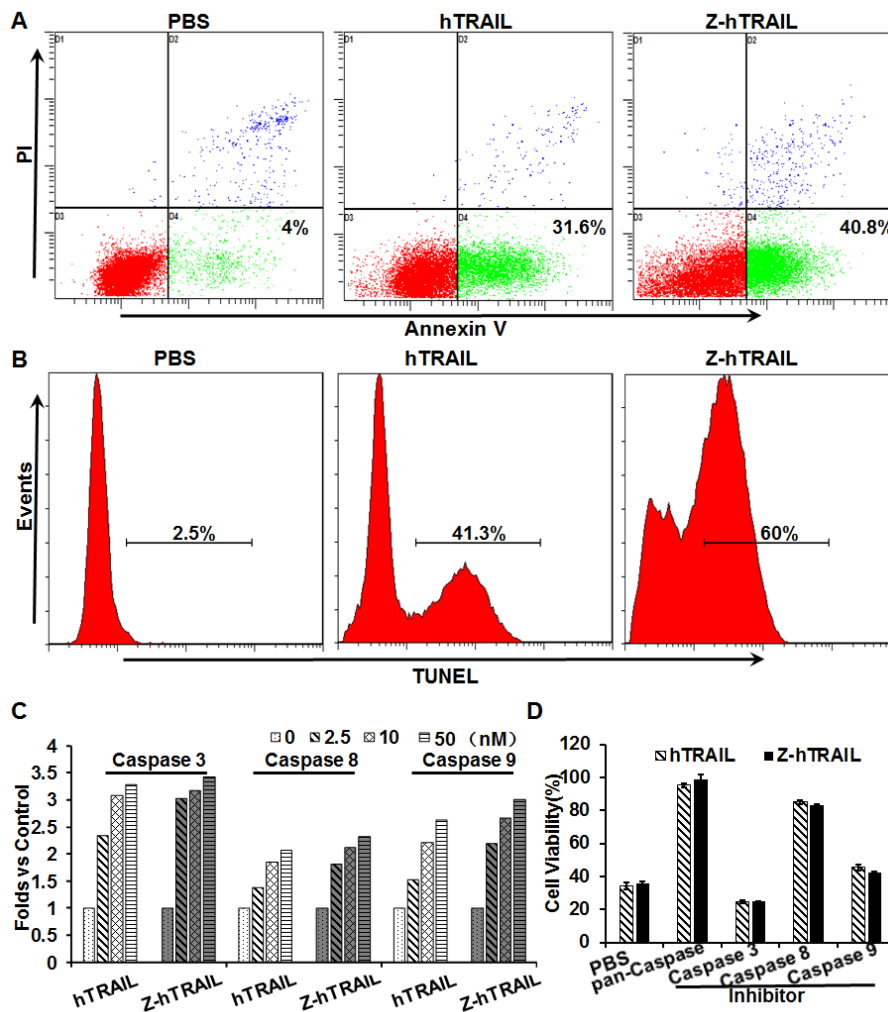

**Figure S6** Apoptosis of COLO205 tumor cells induced by Z-hTRAIL and hTRAIL. **(A)** Annexin V/propidium iodide (PI) dual staining assay. Cells ( $4 \times 10^5$ ) were treated with Z-hTRAIL or hTRAIL (0.5 nM) for 2 h at  $37^\circ\text{C}$ . Subsequently, the cells were dually stained with Annexin V and PI followed by flow cytometry analysis. Annexin V<sup>-</sup>/PI<sup>+</sup> cells were considered apoptotic cells. **(B)** TUNEL staining assay. Cells ( $1 \times 10^6$ ) were treated with Z-hTRAIL or hTRAIL (2.5 nM) at  $37^\circ\text{C}$  for 2 h. Subsequently, the cells were dually stained with TUNEL solution prior to flow cytometry. **(C)** Caspase activity assay. Cells ( $6 \times 10^6$ ) were treated with different concentrations (0-50 nM) of Z-hTRAIL or hTRAIL at  $37^\circ\text{C}$  for 2 h. Subsequently, the activities of caspase 3, 8, and 9 were measured using specific chromogenic substrates. The activity of caspases in protein-treated cells was expressed as fold vs PBS-treated cells. **(D)** Caspase inhibitor-mediated reduction of cytotoxicity in tumor cells. Cells ( $1 \times 10^4$  cells/well) were seeded in 96-well plates and preincubated with caspase 3-, 8-, and 9-specific inhibitors or a pan-caspase inhibitor (20  $\mu\text{M}$ ) at  $37^\circ\text{C}$  for 2 h prior to addition of Z-hTRAIL (4 nM) or hTRAIL (25 nM). After treatment at  $37^\circ\text{C}$  overnight, the surviving cells were examined using CCK-8 solution.

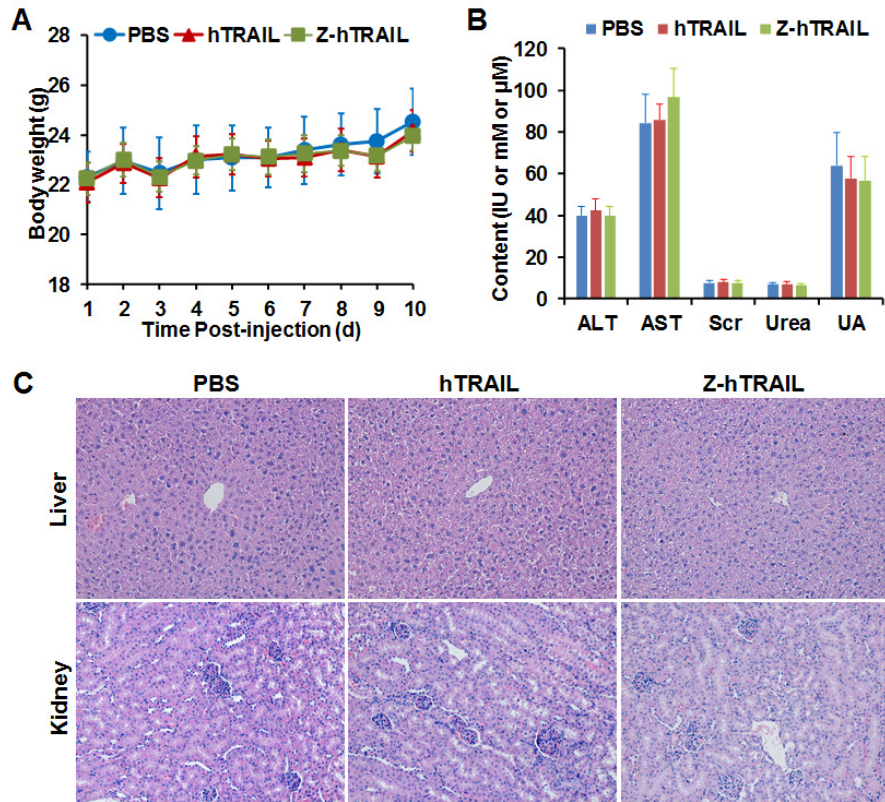

**Figure S7** Acute cytotoxicity of Z-hTRAIL. **(A)** Body weight of mice. **(B)** Blood biochemical indicators for function of liver (ALT and AST) and kidney (Scr, Urea and UA) of mice. **(C)** Structure of liver and kidney of mice illustrated by H&E staining. Original magnification,  $\times 200$ .
